# Supplementary material
Source: JCI journal article supplement (doi:10.1172/jci190833)

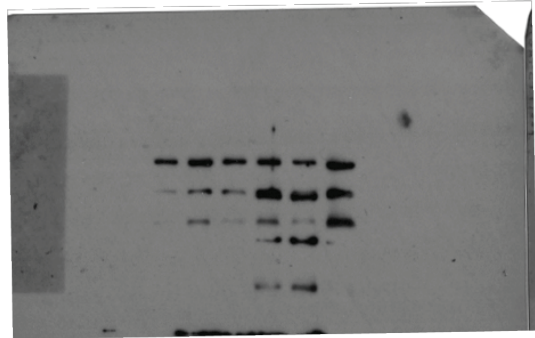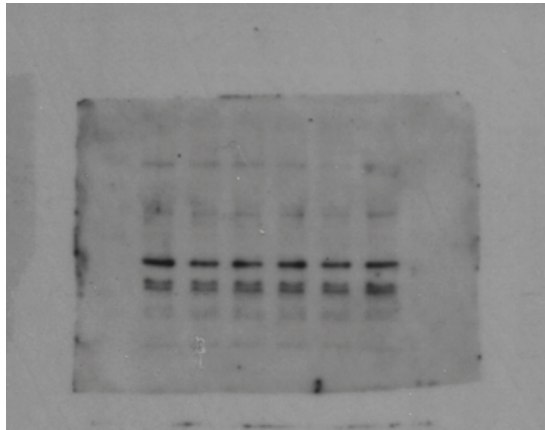

Fig. 3D

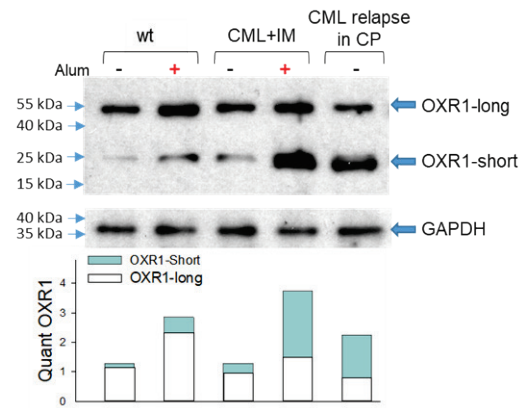

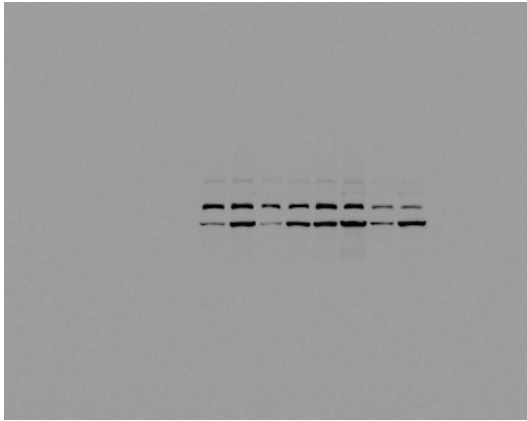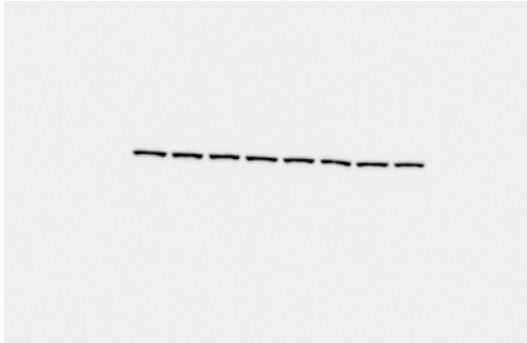

Fig. 4C

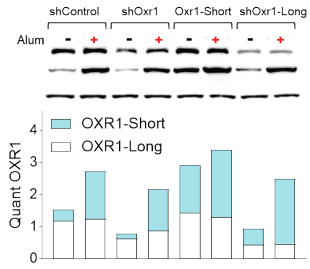

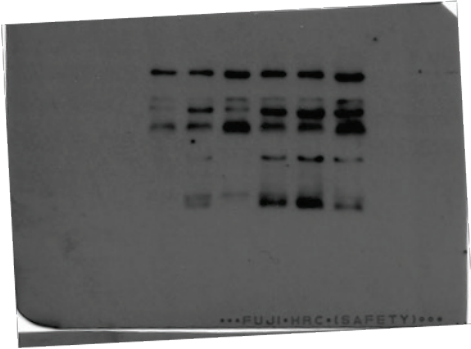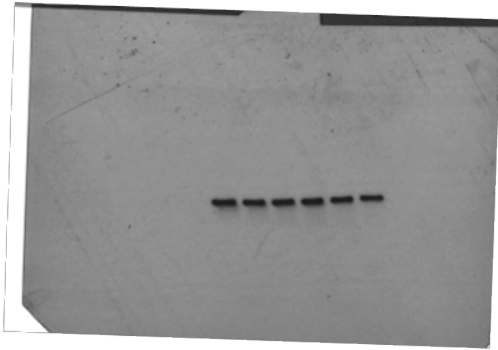

Fig. 5B

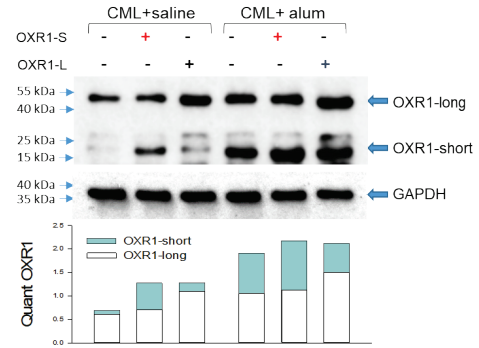

Supplement: sd2 [file 2]
